# Supplementary material for: Appropriate Implantable Cardioverter-Defibrillator Therapy in Patients with Ventricular Arrhythmia of Unclear Cause in Secondary Prevention of Sudden Cardiac Death
Source: MDPI journal article supplement (doi:10.3390/jcm12134479), 2023-07-04
Supplement: s1 [file s1]

| <b>Variable</b>                        | <b>Total study population (<i>n</i> = 257)</b> | <b>Ventricular arrhythmia with clear cause (<i>n</i> = 220)</b> | <b>Ventricular arrhythmia with unclear cause (<i>n</i> = 37)</b> | <b><i>P</i>-value</b> |
|----------------------------------------|------------------------------------------------|-----------------------------------------------------------------|------------------------------------------------------------------|-----------------------|
| Age (years)                            | 64.1 (52.9 – 71.8)                             | 65.2 (56.0 – 72.0)                                              | 52.3 (43.4 – 63.9)                                               | <b>&lt;0.001</b>      |
| Female sex                             | 45 (17.5%)                                     | 34 (15.5%)                                                      | 11 (29.7%)                                                       | <b>0.035</b>          |
| Presenting ventricular arrhythmia      |                                                |                                                                 |                                                                  | <b>0.007</b>          |
| VF                                     | 173 (67.3%)                                    | 141 (64.1%)                                                     | 32 (86.5%)                                                       |                       |
| Sustained VT                           | 84 (32.7%)                                     | 79 (35.9%)                                                      | 5 (13.5%)                                                        |                       |
| OHCA                                   | 182 (70.8%)                                    | 149 (67.7%)                                                     | 33 (89.2%)                                                       | <b>0.008</b>          |
| Type of ICD                            |                                                |                                                                 |                                                                  | <b>&lt;0.001</b>      |
| S-ICD                                  | 12 (4.7%)                                      | 4 (1.8%)                                                        | 8 (21.6%)                                                        |                       |
| VVI-ICD                                | 121 (47.1%)                                    | 102 (46.4%)                                                     | 19 (51.4%)                                                       |                       |
| DDD-ICD                                | 88 (34.2%)                                     | 78 (35.5%)                                                      | 10 (27.0%)                                                       |                       |
| CRT-D                                  | 36 (14.0%)                                     | 36 (16.4%)                                                      | 0 (0.0%)                                                         |                       |
| BMI (kg/m <sup>2</sup> )               | 26.5 (24.4 – 29.4)                             | 26.8 (24.6 – 29.4)                                              | 25.3 (23.9 – 30.1)                                               | 0.216                 |
| NYHA class                             |                                                |                                                                 |                                                                  | 0.139                 |
| I or II                                | 175 (68.1%)                                    | 149 (67.7%)                                                     | 26 (70.3%)                                                       |                       |
| III or IV                              | 30 (11.7%)                                     | 29 (13.2%)                                                      | 1 (2.7%)                                                         |                       |
| Medical history                        |                                                |                                                                 |                                                                  |                       |
| Hypertension                           | 124 (48.2%)                                    | 108 (49.1%)                                                     | 16 (43.2%)                                                       | 0.510                 |
| Dyslipidemia                           | 96 (37.4%)                                     | 90 (40.9%)                                                      | 6 (16.2%)                                                        | <b>0.004</b>          |
| Myocardial infarction                  | 137 (53.3%)                                    | 137 (62.3%)                                                     | 0 (0.0%)                                                         | <b>&lt;0.001</b>      |
| DM                                     | 48 (18.7%)                                     | 43 (19.5%)                                                      | 5 (13.5%)                                                        | 0.384                 |
| Family history SCD                     | 24 (9.3%)                                      | 22 (10.0%)                                                      | 2 (5.4%)                                                         | 0.545                 |
| Syncope                                | 24 (9.3%)                                      | 20 (9.1%)                                                       | 4 (10.8%)                                                        | 0.760                 |
| Prior heart surgery                    | 66 (25.7%)                                     | 66 (30.0%)                                                      | 0 (0.0%)                                                         | <b>&lt;0.001</b>      |
| Atrial fibrillation                    | 86 (33.5%)                                     | 77 (35.0%)                                                      | 9 (24.3%)                                                        | 0.203                 |
| Non-sustained VT                       | 47 (18.3%)                                     | 40 (18.2%)                                                      | 7 (18.9%)                                                        | 0.915                 |
| CAD                                    |                                                |                                                                 |                                                                  | <b>&lt;0.001</b>      |
| No                                     | 93 (36.2%)                                     | 59 (26.8%)                                                      | 34 (91.9%)                                                       |                       |
| 1 coronary artery                      | 39 (15.2%)                                     | 36 (16.4%)                                                      | 3 (8.1%)                                                         |                       |
| 2 coronary arteries                    | 54 (21.0%)                                     | 54 (24.5%)                                                      | 0 (0.0%)                                                         |                       |
| 3 coronary arteries                    | 64 (24.9%)                                     | 64 (29.1%)                                                      | 0 (0.0%)                                                         |                       |
| Echocardiography                       |                                                |                                                                 |                                                                  |                       |
| LVEF (%)                               | 45 (34 – 53)                                   | 41 (33 – 50)                                                    | 55 (51 – 58)                                                     | <b>&lt;0.001</b>      |
| LAVI (mL/m <sup>2</sup> )              | 35 (29 – 45)                                   | 37 (30 – 45)                                                    | 31 (25 – 38)                                                     | <b>0.015</b>          |
| Maximum myocardial wall thickness (mm) | 10.9 ± 2.1                                     | 10.9 ± 2.1                                                      | 10.8 ± 2.2                                                       | 0.883                 |
| LVEDD (mm)                             | 55.1 ± 8.5                                     | 55.8 ± 8.6                                                      | 50.9 ± 6.6                                                       | <b>0.002</b>          |
| LV mass (g)                            | 213 ± 64                                       | 218 ± 64                                                        | 185 ± 57                                                         | <b>0.018</b>          |
| RVF                                    |                                                |                                                                 |                                                                  | 0.202                 |
| Poor                                   | 3 (1.2%)                                       | 3 (1.4%)                                                        | 0 (0.0%)                                                         |                       |
| Mediocre                               | 6 (2.3%)                                       | 6 (2.7%)                                                        | 0 (0.0%)                                                         |                       |
| Reasonable                             | 36 (14.0%)                                     | 34 (15.5%)                                                      | 2 (5.4%)                                                         |                       |
| Good                                   | 195 (75.9%)                                    | 160 (72.7%)                                                     | 35 (94.6%)                                                       |                       |
| Mitral insufficiency                   |                                                |                                                                 |                                                                  | <b>0.002</b>          |
| None                                   | 153 (59.5%)                                    | 121 (55.0%)                                                     | 32 (86.5%)                                                       |                       |
| Mild (grade 1)                         | 61 (23.7%)                                     | 58 (26.4%)                                                      | 3 (8.1%)                                                         |                       |
| Moderate (grade 2)                     | 20 (7.8%)                                      | 20 (9.1%)                                                       | 0 (0.0%)                                                         |                       |
| Severe (grade 3)                       | 5 (1.9%)                                       | 4 (1.8%)                                                        | 1 (2.7%)                                                         |                       |
| LGE on CMR                             |                                                |                                                                 |                                                                  | <b>&lt;0.001</b>      |
| Yes                                    | 80 (31.1%)                                     | 73 (33.2%)                                                      | 7 (18.9%)                                                        |                       |
| No                                     | 53 (20.6%)                                     | 27 (12.3%)                                                      | 26 (70.3%)                                                       |                       |
| Electrocardiography                    |                                                |                                                                 |                                                                  |                       |
| Rhythm                                 |                                                |                                                                 |                                                                  | 0.406                 |
| Sinus rhythm                           | 221 (86.0%)                                    | 187 (85.0%)                                                     | 34 (91.9%)                                                       |                       |

|                                   |                   |                   |                 |                  |
|-----------------------------------|-------------------|-------------------|-----------------|------------------|
| Atrial fibrillation               | 28 (10.9%)        | 26 (11.8%)        | 2 (5.4%)        | 0.370            |
| Atrial flutter                    | 2 (0.8%)          | 2 (0.9%)          | 0 (0.0%)        |                  |
| Pacemaker                         | 3 (1.2%)          | 2 (0.9%)          | 1 (2.7%)        |                  |
| Ventricular heart rate (bpm)      | 67 ± 14           | 67 ± 14           | 69 ± 12         |                  |
| PR interval (ms)                  | 168 (152 – 188)   | 168 (152 – 190)   | 164 (148 – 186) | 0.338            |
| QRS duration (ms)                 | 108 (98 – 128)    | 111 (98 – 133)    | 96 (88 – 106)   | <b>&lt;0.001</b> |
| QRS axis (degrees)                | 31 (-13 – 65)     | 30 (-18 – 64)     | 37 (-1 – 74)    | 0.072            |
| QT interval (ms)                  | 434 ± 51          | 441 ± 52          | 399 ± 33        | <b>&lt;0.001</b> |
| QRS fragmentation                 |                   |                   |                 | <b>&lt;0.001</b> |
| Yes                               | 90 (35.0%)        | 77 (35.0%)        | 13 (35.1%)      | 0.062            |
| QRS > 120ms                       | 74 (28.8%)        | 72 (32.7%)        | 2 (5.4%)        |                  |
| QRS morphology                    |                   |                   |                 |                  |
| Normal                            | 140 (54.5%)       | 111 (50.5%)       | 29 (78.4%)      |                  |
| LBBB                              | 25 (9.7%)         | 24 (10.9%)        | 1 (2.7%)        |                  |
| LAFB                              | 38 (14.8%)        | 34 (15.5%)        | 4 (10.8%)       |                  |
| LPFB                              | 4 (1.6%)          | 3 (1.4%)          | 1 (2.7%)        |                  |
| RBBB                              | 14 (5.4%)         | 13 (5.9%)         | 1 (2.7%)        |                  |
| RBBB + LAFB                       | 10 (3.9%)         | 10 (4.5%)         | 0 (0.0%)        |                  |
| RBBB + LPFB                       | 3 (1.2%)          | 3 (1.4%)          | 0 (0.0%)        |                  |
| IVCD                              | 18 (7.0%)         | 18 (8.2%)         | 0 (0.0%)        |                  |
| Pacing                            | 3 (1.2%)          | 2 (0.9%)          | 1 (2.7%)        |                  |
| Early repolarization              | 15 (5.8%)         | 12 (5.5%)         | 3 (8.1%)        |                  |
| Laboratory values                 |                   |                   |                 | 0.463            |
| Hb (mmol/L)                       | 8.1 ± 1.2         | 8.1 ± 1.2         | 8.3 ± 1.1       |                  |
| Na <sup>+</sup> (mmol/L)          | 140 (138 – 141)   | 140 (138 – 141)   | 140 (139 – 141) |                  |
| K <sup>+</sup> (mmol/L)           | 4.2 ± 0.4         | 4.2 ± 0.4         | 4.2 ± 0.4       |                  |
| Creatinine (μmol/L)               | 86 (75 – 100)     | 88 (77 – 104)     | 75 (64 – 87)    | <b>&lt;0.001</b> |
| eGFR (mL/min/1.73m <sup>2</sup> ) | 77 ± 23           | 75 ± 23           | 91 ± 21         | <b>&lt;0.001</b> |
| Urea (mmol/L)                     | 6.2 (4.9 – 7.7)   | 6.3 (4.9 – 8.1)   | 5.3 (4.6 – 6.8) | <b>0.008</b>     |
| NT-proBNP (ng/L)                  | 656 (226 – 1,625) | 891 (295 – 1,831) | 155 (46 – 330)  | <b>&lt;0.001</b> |
| Medication at baseline            |                   |                   |                 | <b>&lt;0.001</b> |
| ACE-I/ARB                         | 113 (44.0%)       | 106 (48.2%)       | 7 (18.9%)       |                  |
| β-blocker                         | 125 (48.6%)       | 118 (53.6%)       | 7 (18.9%)       |                  |
| Calcium antagonist                | 43 (16.7%)        | 39 (17.7%)        | 4 (10.8%)       |                  |
| Diuretic                          | 56 (21.8%)        | 54 (24.5%)        | 2 (5.4%)        | <b>0.007</b>     |
| Statin                            | 111 (43.2%)       | 107 (48.6%)       | 4 (10.8%)       | <b>&lt;0.001</b> |
| MRA                               | 22 (8.6%)         | 22 (10.0%)        | 0 (0.0%)        | 0.052            |
| Class 1 antiarrhythmic drugs      | 1 (0.4%)          | 1 (0.5%)          | 0 (0.0%)        | 1.000            |
| Class 3 antiarrhythmic drugs      | 15 (5.8%)         | 15 (6.8%)         | 0 (0.0%)        | 0.137            |
| Digoxin                           | 9 (3.5%)          | 9 (4.1%)          | 0 (0.0%)        | 0.364            |

Data are expressed as *n* (%) in case of categorical data, mean ± standard deviation (SD) in case of normally distributed continuous data and median and interquartile range (IQR) in case of continuous data with a skewed distribution. In some cases, numbers may not add up to 100% due to missing data. The presented *P*-values reflect a comparison between patients with ventricular arrhythmia of clear and unclear cause and are presented in bold if *P* < 0.05. ACE-I, angiotensin-converting enzyme inhibitor; ARB, angiotensin receptor blocker; BMI, body mass index; CAD, coronary artery disease; CMR, cardiac magnetic resonance; CRT-D, cardiac resynchronization therapy ICD; DDD-ICD, dual-chamber ICD; DM, diabetes mellitus; eGFR, estimated glomerular filtration rate; Hb, hemoglobin; ICD, implantable cardioverter-defibrillator; IVCD, intraventricular conduction delay; LAFB, left anterior fascicular block; LAVI, left atrial volume index; LBBB, left bundle branch block; LGE, late gadolinium enhancement; LPFB, left posterior fascicular block; LV, left ventricle; LVEDD, left ventricular end-diastolic diameter; LVEF, left ventricular ejection fraction; MRA, mineralocorticoid receptor antagonist; NT-proBNP, N-terminal pro-brain natriuretic peptide; NYHA, New York Heart Association; OHCA, out-of-hospital cardiac arrest; RBBB, right bundle branch block; RVF, right ventricular function; SCD, sudden cardiac death; S-ICD, subcutaneous ICD; VF, ventricular fibrillation; VT, ventricular tachycardia; VVI-ICD, single-chamber ICD.

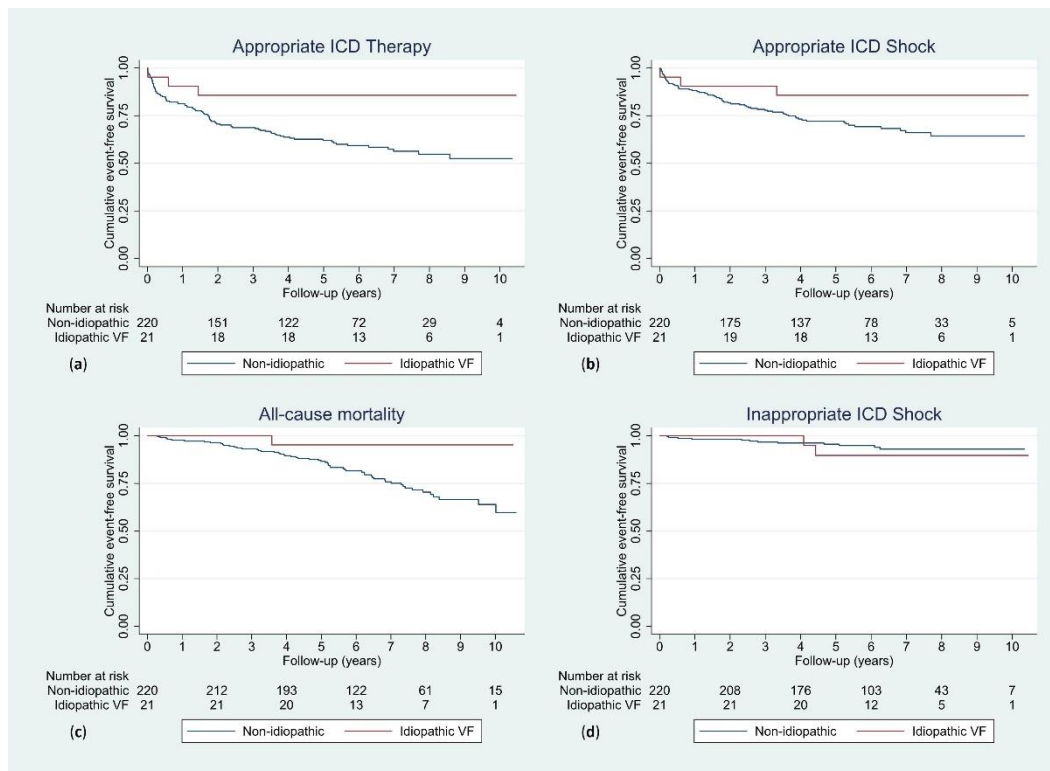

**Figure S1.** Kaplan-Meier curves displaying cumulative event-free survival for the idiopathic VF and non-idiopathic groups with appropriate ICD therapy (log-rank test  $P = 0.022$ ) (a), appropriate ICD shock (log-rank test  $P = 0.109$ ) (b), all-cause mortality (log-rank test  $P = 0.045$ ) (c) and inappropriate ICD shock (log-rank test  $P = 0.529$ ) (d) as outcomes. ICD, implantable cardioverter-defibrillator; VF, ventricular fibrillation.

| Table S2. Cox regression with idiopathic VF as determinant of the outcomes, both univariably and after adjusting for potential confounders. |                    |         |                      |         |
|---------------------------------------------------------------------------------------------------------------------------------------------|--------------------|---------|----------------------|---------|
|                                                                                                                                             | Univariable        |         | Adjusted             |         |
| Outcome                                                                                                                                     | HR (95% CI)        | P-value | HR (95% CI)          | P-value |
| Appropriate ICD therapy                                                                                                                     | 0.28 (0.09 – 0.90) | 0.032   | 0.48 (0.14 – 1.65)*  | 0.245   |
| Appropriate ICD shock                                                                                                                       | 0.40 (0.13 – 1.28) | 0.122   | 0.75 (0.21 – 2.72)*  | 0.659   |
| All-cause mortality                                                                                                                         | 0.17 (0.02 – 1.22) | 0.078   | 0.70 (0.09 – 5.65)§  | 0.741   |
| Inappropriate ICD shock                                                                                                                     | 1.61 (0.36 – 7.20) | 0.532   | 2.28 (0.44 – 11.80)° | 0.328   |

CI, confidence interval; HR, hazard ratio; ICD, implantable cardioverter-defibrillator; VF, ventricular fibrillation.

\* Adjusted for age, sex, BMI, index arrhythmia, history of atrial fibrillation, prior syncope, history of non-sustained VT, history of myocardial infarction, QRS fragmentation, eGFR and left ventricular ejection fraction.

§ Adjusted for age, sex, index arrhythmia, diabetes, history of myocardial infarction, history of heart surgery and eGFR.

° Adjusted for age, sex and rhythm on ECG.

| <b>Table S3. Cox regression with idiopathic VF as determinant of the outcomes after adjusting for potential confounders, using multiple imputation.</b> |                      |                |
|---------------------------------------------------------------------------------------------------------------------------------------------------------|----------------------|----------------|
|                                                                                                                                                         | <b>Adjusted</b>      |                |
| <b>Outcome</b>                                                                                                                                          | <b>HR (95% CI)</b>   | <b>P-value</b> |
| Appropriate ICD therapy                                                                                                                                 | 0.42 (0.12 – 1.42)*  | 0.162          |
| Appropriate ICD shock                                                                                                                                   | 0.62 (0.18 – 2.20)*  | 0.460          |
| All-cause mortality                                                                                                                                     | 0.69 (0.09 – 5.47)§  | 0.723          |
| Inappropriate ICD shock                                                                                                                                 | 2.27 (0.44 – 11.80)° | 0.328          |

CI, confidence interval; HR, hazard ratio; ICD, implantable cardioverter-defibrillator; VF, ventricular fibrillation.

\* Adjusted for age, sex, BMI, index arrhythmia, history of atrial fibrillation, prior syncope, history of non-sustained VT, history of myocardial infarction, QRS fragmentation, eGFR and left ventricular ejection fraction.

§ Adjusted for age, sex, index arrhythmia, diabetes, history of myocardial infarction, history of heart surgery and eGFR.

° Adjusted for age, sex and rhythm on ECG.
